# Supplementary material for: IRF2BPL gene variants with dystonia: one new Chinese case report
Source: PubMed Central journal article supplement (PMC9862514; doi:10.1186/s12883-023-03077-x), 2023-01-21
Supplement: 12883_2023_3077_MOESM1_ESM.pdf [file 12883_2023_3077_MOESM1_ESM.pdf]

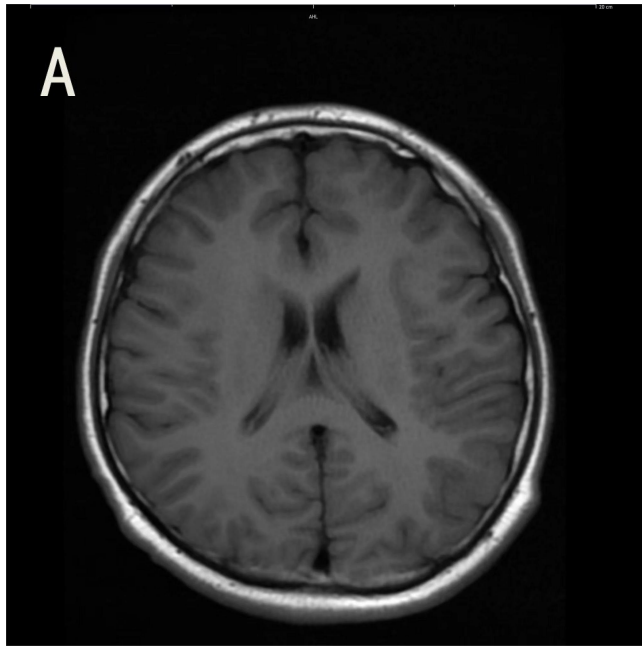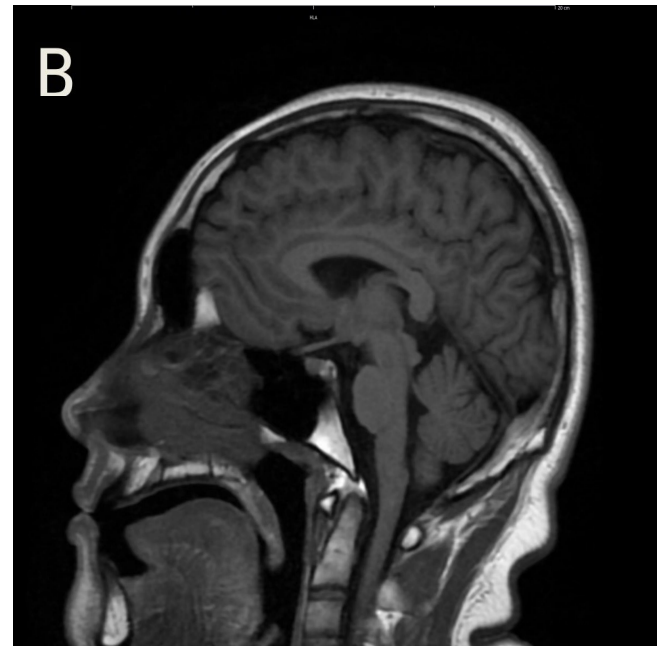

Figure1: Brain MRI was normal at 7 years old. MRI. (A, sagittal T1; B, axial FLAIR)

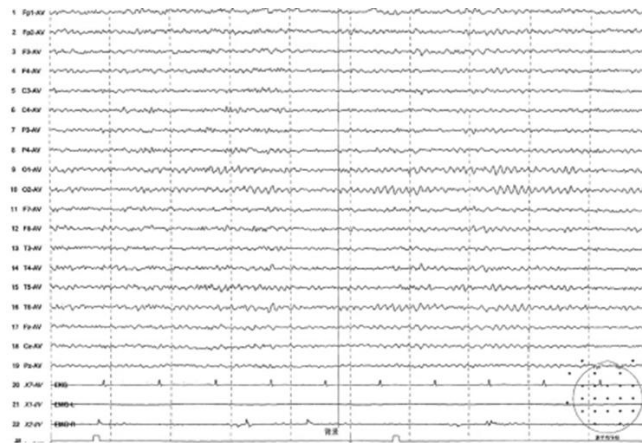

Figure2: EEG was normal at 7 years old.
