# Supplementary material for: IRF2BPL gene variants with dystonia: one new Chinese case report
Source: PubMed Central journal article supplement (PMC9862514; doi:10.1186/s12883-023-03077-x), 2023-01-21
Supplement: 12883_2023_3077_MOESM2_ESM.pdf [file 12883_2023_3077_MOESM2_ESM.pdf]

Table Neurodevelopmental phenotype with dystonia of patients with IRF2BPL variants

| Patient | age                  | IRF2BPL variant                                | Type of mutation | Seizure onset | Physical examination                                                                      | Motor stats                                                                                                       | Language status                                                                             | Brain MRI*                                                                          | Others                                                                                                                         |
|---------|----------------------|------------------------------------------------|------------------|---------------|-------------------------------------------------------------------------------------------|-------------------------------------------------------------------------------------------------------------------|---------------------------------------------------------------------------------------------|-------------------------------------------------------------------------------------|--------------------------------------------------------------------------------------------------------------------------------|
| 1       | 36 years             | c.373C>T (p. Gln125*)                          | Nonsense         | 10 years      | Cerebellar syndrome, chorea, dystonia, severe hyperreflexia                               | Sits up without support, ambulates with assistance                                                                | Not reported                                                                                | Generalized brain atrophy with possible increased iron deposits in deep gray matter | Slow ocular saccades                                                                                                           |
| 2       | Deceased at 12 years | c.519C>G (p.Tyr173*)                           | Nonsense         | 8.5 years     | Dystonia, ataxia, choreoathetosis, spasticity, severe hyperreflexia                       | Nonambulatory by 4.5 years                                                                                        | Spoke few words; lost language by 7 years                                                   | Diffuse atrophy                                                                     | Vertical oculomotor paralysis and horizontal nystagmus                                                                         |
| 3       | 23 years             | c.376C>T (p.Gln126*)                           | Nonsense         | 7 months      | Myoclonus, ataxia, tremor, generalized dystonia, cerebellar dysarthria                    | Ambulatory                                                                                                        | Speaks in short sentences. IQ 40                                                            | Normal                                                                              | Slow dysmetric eye saccades                                                                                                    |
| 4       | 7 years              | c.584G>T (p.Gly195Val) and c.514G>T(p.Gly172*) | Nonsense         | 6 years       | Ataxia, dystonia, choreoathetosis, spasticity, cerebellar signs, bilateral facial palsies | Clumsiness at 2.5 years; required support at 4 years; non-ambulatory at 5.5 years                                 | Spoke at 15 months; lost language at 6.5 years                                              | Not reported                                                                        | horizontal gaze palsy with limited vertical gaze                                                                               |
| 5       | Deceased at 15 years | c.562C>T (p. Arg188*)                          | Nonsense         | None          | Dystonia, lower extremity spasticity, dysarthria                                          | Ataxia at 5–6 years. non-ambulatory by 10 years, unable to use hands by 11 years                                  | Loss of fluency (though intact cognition) at 9 years, complete loss of language at 11 years | (8 years) mild cerebellar atrophy, small cerebellum and “bulky” corpus callosum     | Continuous CPAP <sup>‡</sup> requirement, Loss of bowl/bladder control by 8 years, sialorrhea, progressive Feeding intolerance |
| 6       | 16 years             | c.379C>T (p.Gln127*)                           | Nonsense         | 6 years       | Dystonia                                                                                  | Can walk for short periods                                                                                        | Lost language by 12 years                                                                   | (6 and 13 years) Normal; (15 years) thinning of corpus callosum                     | Attention deficit hyperactivity disorder                                                                                       |
| 7       | 43 years             | c.376C>T (p.Gln126*)                           | Nonsense         | 10 years      | Hypotonia, ataxia, spastic rigidity, athetosis, dystonia, dyskinesia, hyperreflexia       | Walked at 18.5 months; ataxia at 15 years; non-ambulatory 28 years; bed-ridden at 35 years due to severe dystonia | Functional status not commented on; however, lost language by late teens/20s                | (34 years) global atrophy thinning of corpus callosum                               | -                                                                                                                              |
| 8       | Deceased at 54 years | c.581_599del, p. Gly194Alafs*12                | Frameshift       | None          | Muscular tension, ataxia, dystonia                                                        | (19 years) walking on toes; (42years) wheelchair-bound                                                            | unable to speak a few years into the disease                                                | Striatal atrophy                                                                    | (6years) Bilateral keratoconus                                                                                                 |

|    |                        |                                   |                |         |                                                                                            |                                                     |                               |                               |                                             |
|----|------------------------|-----------------------------------|----------------|---------|--------------------------------------------------------------------------------------------|-----------------------------------------------------|-------------------------------|-------------------------------|---------------------------------------------|
| 9  | 50years                | c.584delG; p.<br>(Gly195Alafs*17) | Frameshi<br>ft |         | dystonia,<br>extrapyramidal and<br>pyramidal signs                                         | gait ataxia                                         | severe dysarthria             | Not reported                  | cognitive and<br>psychiatric symp-<br>toms  |
| 10 | 24 years               | c.364C> T,<br>p.Gln122Ter         | Nonsense       | 22years | multifocal myoclonic<br>jerks, intention tremor<br>in the<br>four limbs and gait<br>ataxia | frequent falls                                      | Not reported                  | bilateral gliotic<br>lesions. | impairment in<br>long-term verbal<br>memory |
| 11 | 10 years<br>(ours<br>) | C.562C>T(p.Arg188*)               | Nonsense       |         | Dystonia,<br>hyperreflexia,<br>dysarthria,                                                 | Decline in gait by 8<br>years, now<br>nonambulatory | Lost language by<br>9.5 years | (8 years) Normal              | Sialorrhea                                  |
